# Supplementary material for: Toca-1 is suppressed by p53 to limit breast cancer cell invasion and tumor metastasis
Source: Springer Nature journal article supplement (doi:10.1186/s13058-014-0503-x), 2014-12-29
Supplement: MOESM1 [file 9781304]

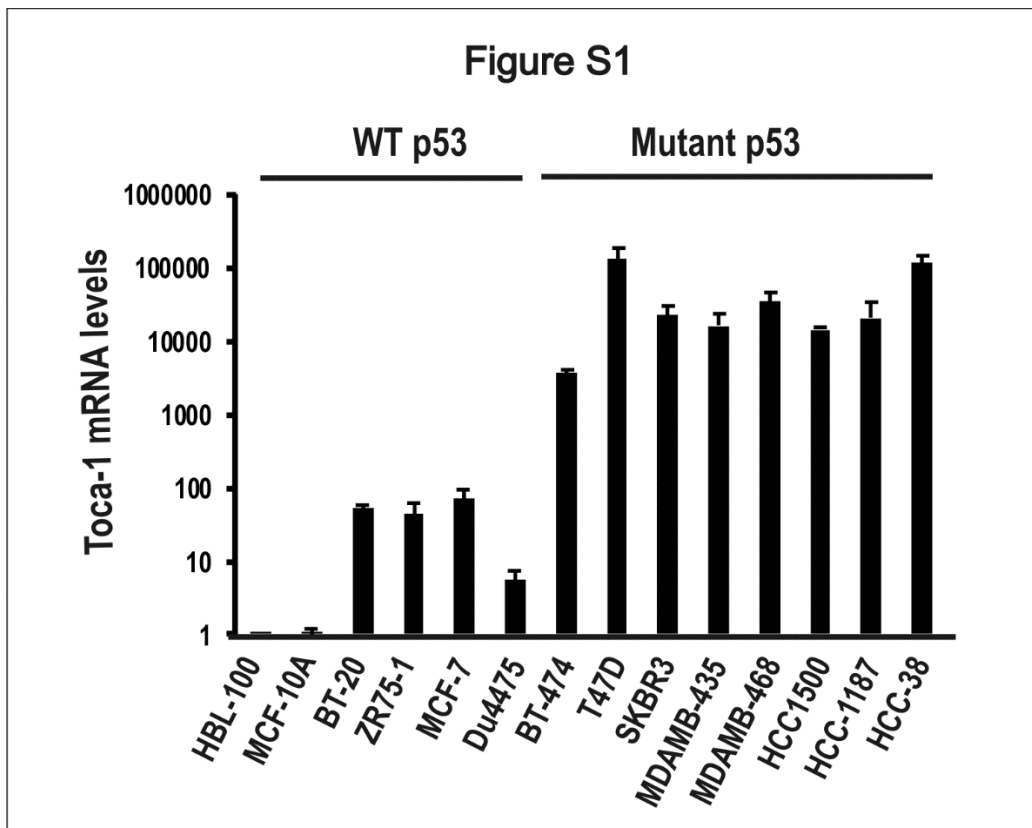

**Figure S1.** Toca-1 transcript level profiling in breast cancer cell lines according to p53 mutation status. Toca-1 mRNA levels were measured for the same panel of cell lines by qRT-PCR ( $2^{-\Delta\Delta CT}$  values for Toca-1 were normalized to GAPDH for each cell line, and graph depicts transcript levels relative to HBL-100 cells (mean  $\pm$  SD; triplicate samples).
