# Supplementary material for: Toca-1 is suppressed by p53 to limit breast cancer cell invasion and tumor metastasis
Source: Springer Nature journal article supplement (doi:10.1186/s13058-014-0503-x), 2014-12-29
Supplement: MOESM2 [file 9781304]

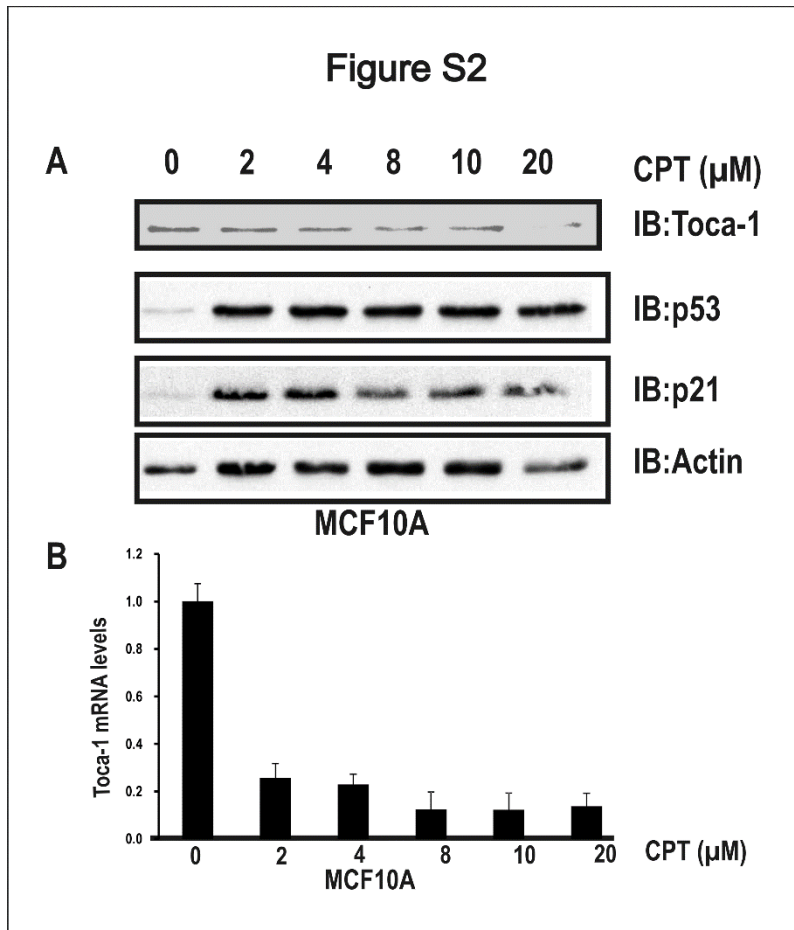

**Figure S2.** Toca-1 downregulation by p53 in MCF10A breast epithelial cells **(A)** MCF10A were treated with the indicated doses of CPT for 24 hours. Lysates were subjected to IB for Toca-1, p53, p21, and  $\beta$ -actin. **(B)** RNA was isolated from MCF10A cells treated as above for qRT-PCR analysis of Toca-1 mRNA levels ( $2^{-\Delta\Delta\text{CT}}$  values for Toca-1 were normalized to GAPDH for each concentration of the drug, and graph depicts transcript levels relative to DMSO treated cells (mean  $\pm$  SD; triplicate samples)).
