# Supplementary material for: Toca-1 is suppressed by p53 to limit breast cancer cell invasion and tumor metastasis
Source: Springer Nature journal article supplement (doi:10.1186/s13058-014-0503-x), 2014-12-29
Supplement: MOESM3 [file 9781304]

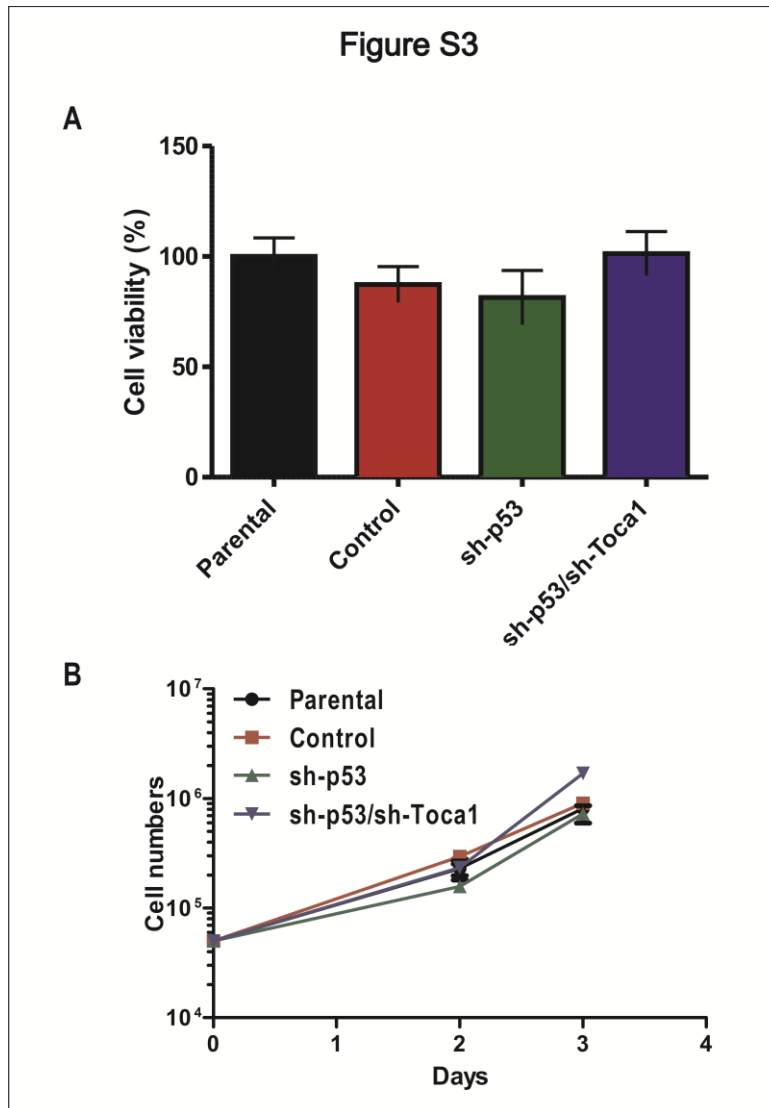

**Figure S3.** Silencing of p53 and Toca-1 does not affect viability or growth of MTLn3 cells  
**(A)** Cell viability was measured using AlamarBlue® assay for MTLn3 parental cells, shRNA control cells, sh-p53 cells and sh-p53/sh-Toca-1 cells as described in Methods. Graph depicts mean absorbance values ( $\pm$  SD) for MTLn3 derivatives relative to parental cells. **(B)** Cell growth rates of MTLn3 parental cells, shRNA control cells, sh-p53 cells and sh-p53/sh-Toca-1 cells were measured at days 2 and 3 post seeding. No significant differences in cell viability or cell growth were observed between cell lines.
