# Supplementary material for: Toca-1 is suppressed by p53 to limit breast cancer cell invasion and tumor metastasis
Source: Springer Nature journal article supplement (doi:10.1186/s13058-014-0503-x), 2014-12-29
Supplement: MOESM4 [file 9781304]

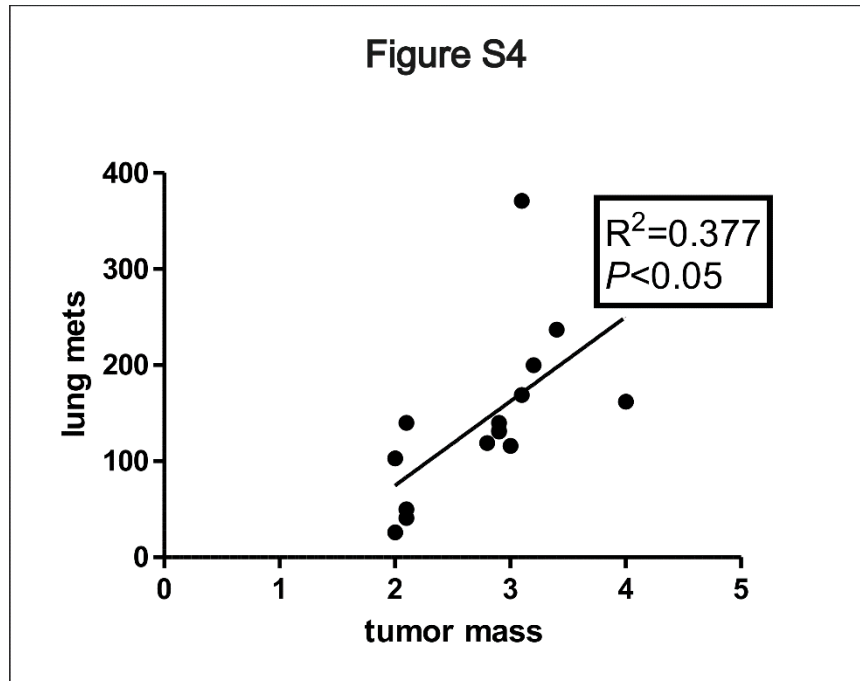

**Figure S4.** Correlation between lung metastases and primary tumor mass in mammary orthotopic MTLn3 xenograft assays. Graph depicts a comparison of primary tumor mass and number of lung metastases in MTLn3 control, sh-p53 and sh-p53/sh-Toca1 cell lines. Although a positive correlation was observed ( $P<0.05$ ), the correlation co-efficient was only 0.377.
